# Supplementary material for: Critical Review of Gaps in the Diagnosis and Management of Drug-Induced Liver Injury Associated with Severe Cutaneous Adverse Reactions
Source: MDPI journal article supplement (doi:10.3390/jcm10225317), 2021-11-15
Supplement: s1 [file s1]

**Supplemental Table S1. Revised Electronic Causality Assessment Method modified items.**

| <b>Domains</b>                  | <b>RECAM modifications</b>                                                                                                               |
|---------------------------------|------------------------------------------------------------------------------------------------------------------------------------------|
| Latency time                    | The domain was revised according to DILIN and Spanish DILI Registry data to optimize clarity, performance, and computerization           |
| Dechallenge time                | The domain was revised according to DILIN and Spanish DILI Registry data to optimize clarity, performance, and computerization           |
| Risk factors                    | This domain was eliminated in the RECAM scale                                                                                            |
| Concomitant drugs               | This domain was eliminated in the RECAM scale                                                                                            |
| Competing diagnoses             | Competing diagnoses from RUCAM were retained and expanded                                                                                |
| Drug specific risk              | The scoring was anchored to LiverTox likelihood scores*                                                                                  |
| Rechallenge.<br>Additional data | Rechallenge information was included in a new domain with additional optional information, such as histology or presence of DRESS or SJS |

Hayashi et al. A revised electronic version of RUCAM for the diagnosis of drug induced liver injury. Hepatology 2020; 72(S1): 712A.

\* LiverTox webpage: <https://www.ncbi.nlm.nih.gov/books/NBK547852>
